# Supplementary material for: Evaluation of 3,5-Diphenyl-2-Pyrazolines for Antimitotic Activity by Inhibition of Tubulin Polymerization
Source: Hindawi journal article supplement (doi:10.1155/2022/3567606), 2022-09-26
Supplement: f1 [file 3567606.f1.pdf]

## **Supplementary Materials**

### **Evaluation of 3,5-diphenyl-2-pyrazolines for antimitotic activity by inhibition of tubulin polymerization**

Soon Young Shin,<sup>1</sup> Euitaek Jung,<sup>1</sup> Young Han Lee,<sup>1</sup> Yoongho Lim,<sup>2</sup> and Dongsoo Koh<sup>3\*</sup>

<sup>1</sup>Department of Biological Sciences, College of Biological Science and Biotechnology, Konkuk University, Seoul 05029, Republic of Korea

<sup>2</sup>Division of Bioscience and Biotechnology, BMIC, Konkuk University, Seoul 05029, Republic of Korea

<sup>3</sup>Department of Applied Chemistry, Dongduk Women's University, Seoul 02748, Republic of Korea

\*Correspondence should be addressed to Dongsoo Koh: [dskoh@dongduk.ac.kr](mailto:dskoh@dongduk.ac.kr)

## Supplementary Figures

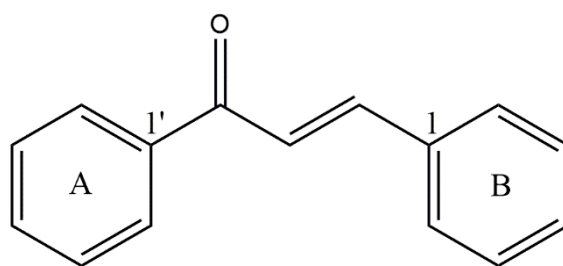

**Fig. S1.** The chemical structure and numbering of chalcone.

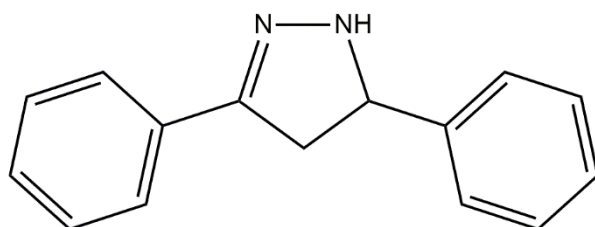

**Fig. S2.** The chemical structure of 3,5-diphenyl-2-pyrazoline.

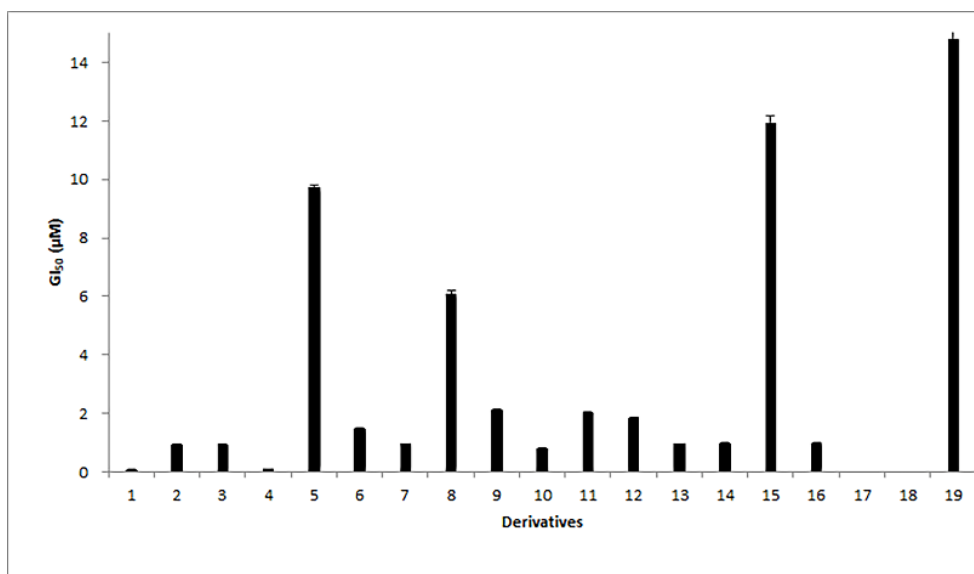

**Fig. S3.** Graph of the half-maximal cell growth inhibitory concentrations (GI<sub>50</sub>) of 3,5-diphenyl-2-pyrazoline derivatives (with error bars).

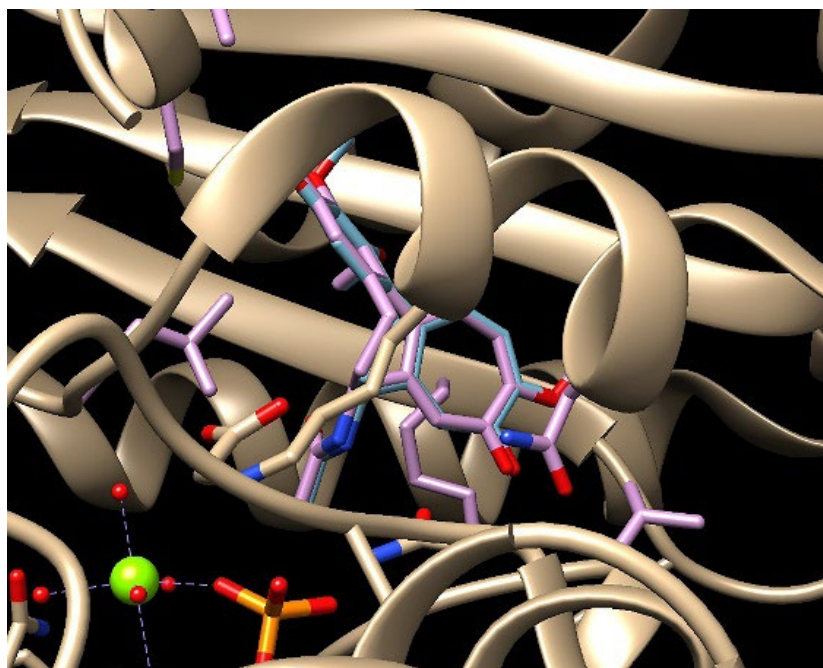

**Fig. S4.** 3D images of colchicine obtained from the current docking (pink) and colchicine contained in the crystallographic structure of tubulin 6xer.pdb as its ligand (cyan) in the binding pocket of the 6xer.pdb generated using PyMol.

(A)

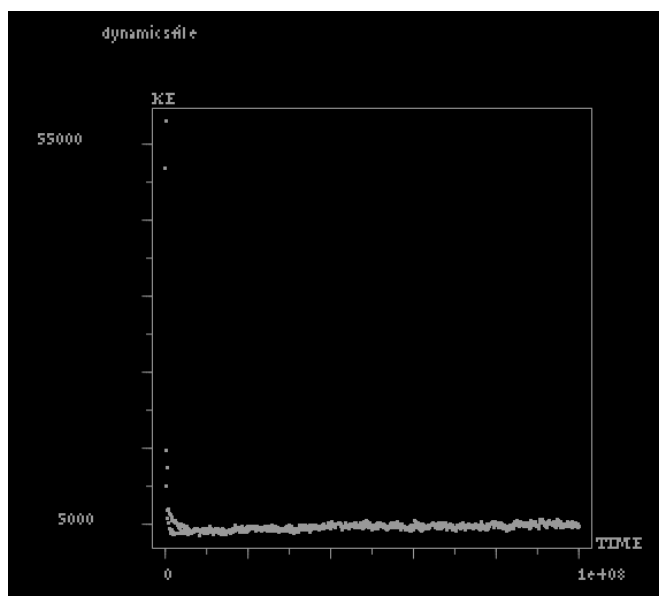

(B)

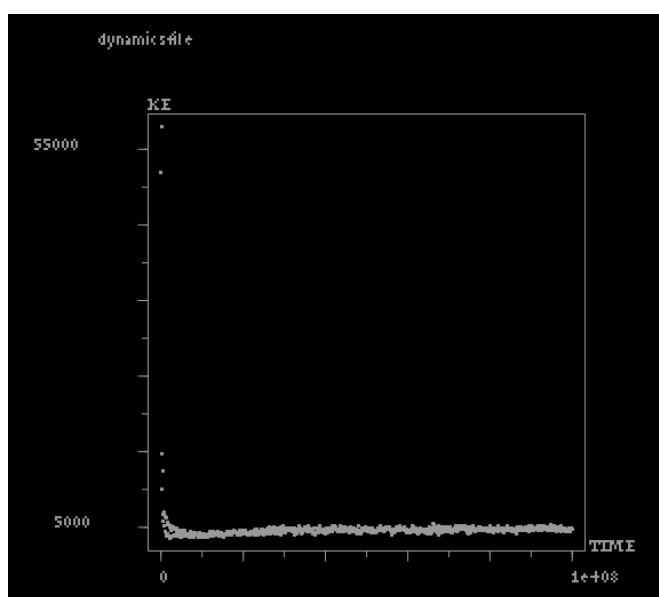

**Fig. S5.** Plots of kinetic energy of colchicine-tubulin complex (A) and derivative **4** (B) against the simulation time 100 nsec.

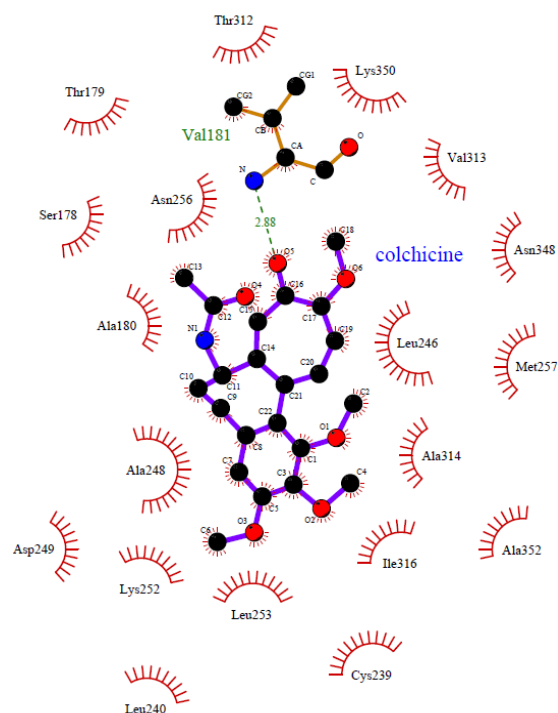

**Fig. S6.** Interactions between colchicine and residues of the holo-protein of 6xer.pdb analyzed using LigPlot. Residues in the red half-circles denote hydrophobic interactions, and Val181 of the A chain forms a hydrogen bond with colchicine.

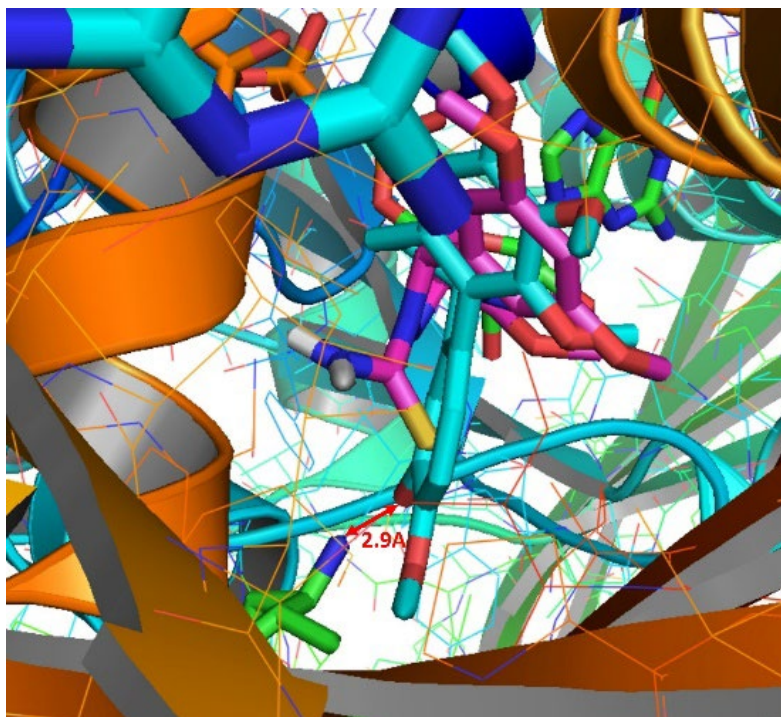

**Fig. S7.** 3D images of colchicine (cyan) and derivative **4** (magenta) contained in the binding pocket of 6xer.pdb generated using PyMol. The hydroxyl group of colchicine forms a hydrogen bond with the nitrogen of Val181 of the A chain (2.9 Å).
